# Supplementary material
Source: PubMed Central journal article supplement (PMC3511752)
Supplement: 1211516109_pnas.201211516SI.pdf [file 1211516109_pnas.201211516SI.pdf]

# Supporting Information

Bencherif et al. 10.1073/pnas.1211516109

## SI Materials and Methods

**Hydrogel Characterization.** Structural analysis of the macroporous gels was performed using a LEO 982 scanning electron microscope (SEM) (LEO Electron Microscopy). To prepare the samples, cryogels in the frozen state following cryogelation were lyophilized and sectioned for observation. The distribution of cells within the scaffolds was also imaged using SEM. Cell-seeded cryogels were washed with PBS, and cells were fixed in 2.5% glutaraldehyde. After the incubation period, scaffolds were rinsed in PBS and dehydrated by gradually increasing ethanol followed by drying in vacuum desiccators. The dried samples were then coated with gold and analyzed by SEM. The average size of pores in cryogels was calculated by averaging the diameters of the pores in the gels observed by SEM.

Micro-computed tomography (micro-CT) was used to analyze the 3D architecture and structural homogeneity of the porous material using micro-CT equipment (HMXST225, X-Tek; Nikon Metrology NV) with associated software (CT Pro software).

The pore connectivity was further evaluated using a water-wicking technique in which the interconnected porosity was calculated as the interconnected void volume over the total volume. To determine total volume, gels were soaked in water for 1 h and weighed. A Kimwipe was then used to wick away water within interconnected pores, and the gels were weighed once again. The interconnected void volume was calculated as the volume of water wicked from the gels.

Young's modulus was determined using an Instron testing system (Instron 3342). Cylindrical hydrogels (8-mm diameter, 5-mm height) were deformed (at constant volume) between two parallel plates with a strain rate of 20% per minute. Engineering stresses and strains were recorded. The gel cylinders were kept hydrated in PBS solution (pH 7.4) throughout the tests.

The swelling ratio was determined using a conventional gravimetric procedure. To investigate the swelling ratio of each sample, cryogels and conventional cylindrical gels were prepared and immersed in PBS. The equilibrium mass swelling ratio ( $Q_M$ ) was calculated by the following equation:

$$Q_M(\%) = [m_s/m_d \times 100],$$

where  $m_s$  and  $m_d$  were fully swollen gel and dried gel weights, respectively. The swelling data were corrected by subtracting the soluble fraction of salt in PBS from the gel.

**Preparation of BSA-Containing Cryogels.** BSA labeled with rhodamine was suspended in a liquid precursor solution before cryopolymerization. Briefly, 10 mg [1% (wt/vol)] of methacrylated (MA)-alginate in deionized water was mixed with rhodamine-labeled BSA [Rhod-BSA or Rhod-BSA-MA, 0.3% (wt/vol)], TEMED [0.5% (wt/vol)], and APS [0.25% (wt/vol)]. Rhod-BSA is physically entrapped within the polymer network, whereas Rhod-BSA-MA is covalently bound to the cryogel due to reactive methacrylate residues. The mixture was immediately poured into a precooled Teflon mold and frozen at  $-20^\circ\text{C}$ . After the fabrication process, the cryogels were thawed and washed to remove free BSA. Thereafter, the solution from the washing step was collected and used to determine the concentration of free BSA after cryogelation, thus providing the concentration of nonencapsulated protein. Fluorescence spectroscopy (Synergy HT; BioTek) was used to detect the fluorescence of rhodamine-labeled BSA. The absorbance value of each sample was read at 490 nm with a microplate reader. Wells containing deionized water were used as blank control and background. The encapsulation efficiency of the fluorescent protein was determined by comparing the absorbance of free BSA and the initial concentration of BSA.

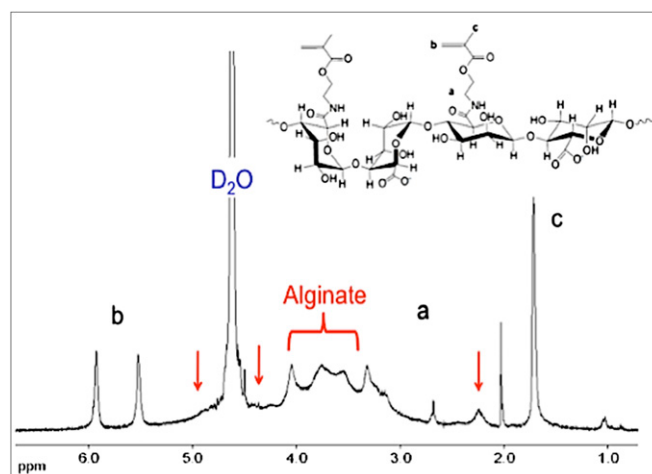

**Fig. S1.**  $^1\text{H}$  NMR of MA-alginate demonstrating its characteristic vinylic peaks (5.3–5.8 ppm). Deuterated water ( $\text{D}_2\text{O}$ ) was used as solvent, and the polymer concentration was 1% (wt/vol). The efficiency of alginate methacrylation was calculated based on the ratio of the integrals for alginate protons to the methylene protons of methacrylate. MA-alginate macromonomer was found to have approximately a degree of methacrylation (DM) of 50%.



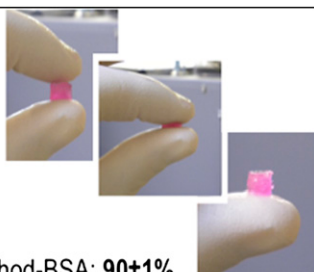

**Fig. S55.** The cryogels were successfully injected in vivo, recovered their original shapes, and remained localized at the point of introduction. *Inset* shows a zoom-in view of injected cryogels with geometric restoration.

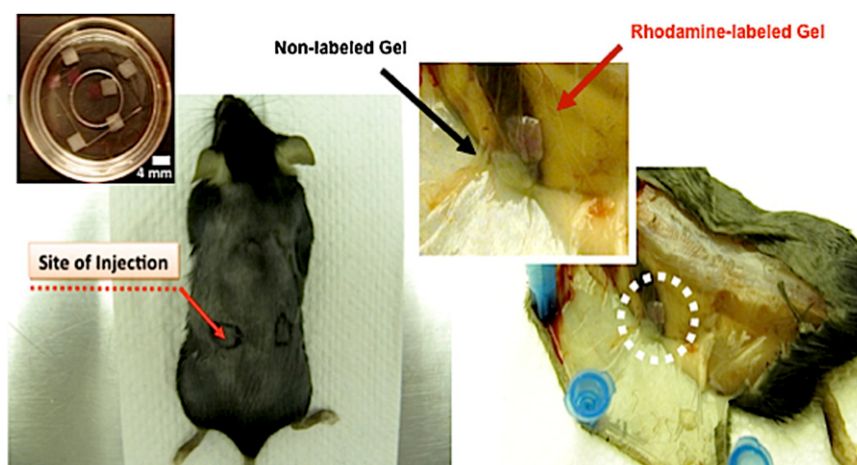

**Fig. S5.** The cryogels were successfully injected in vivo, recovered their original shapes, and remained localized at the point of introduction. *Inset* shows a zoom-in view of injected cryogels with geometric restoration.

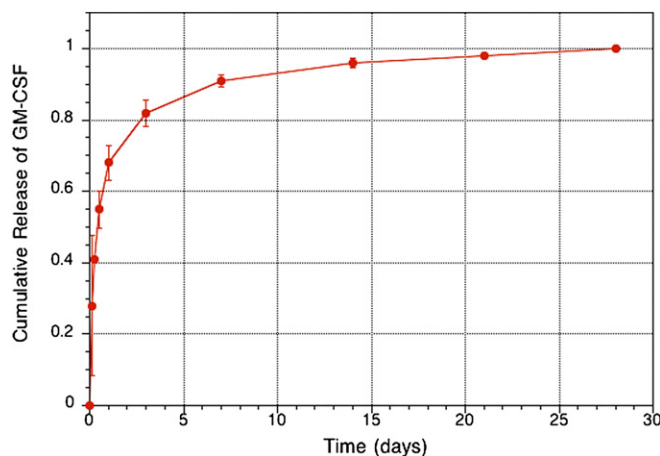Bencherif et al. [www.pnas.org/cgi/content/short/1211516109](http://www.pnas.org/cgi/content/short/1211516109)

**TECHNICAL STEPS INVOLVING CELL LOSS**

**Step 1. Cell seeding into the matrix**

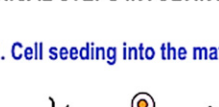

**Cell Retention Efficiency**

**CE<sub>E</sub> (%): 47 ± 8**

**Step 2. Injection of cell-seeded scaffolds**

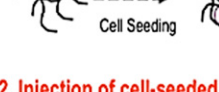

**CR<sub>E</sub> (%): 80 ± 7**

4 of 6

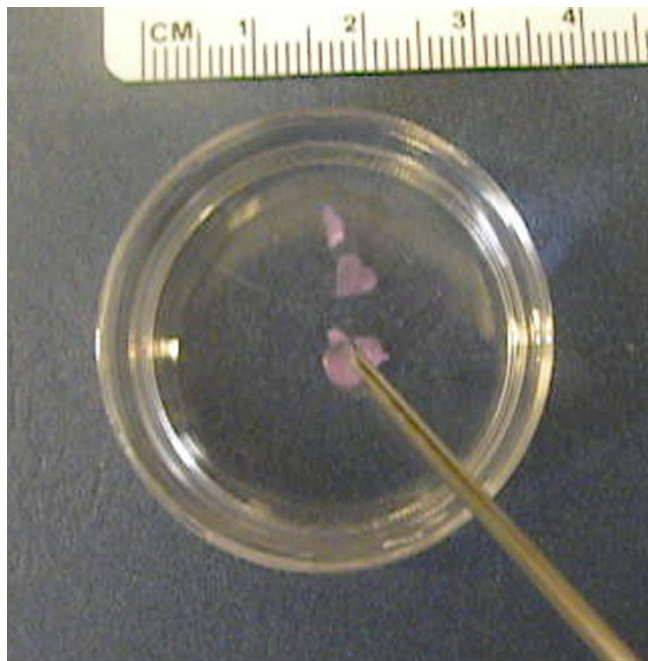

**Movie S1.** Shape-memory properties of geometric cryogels syringe injected via a 16-gauge needle.

[Movie S1](#)

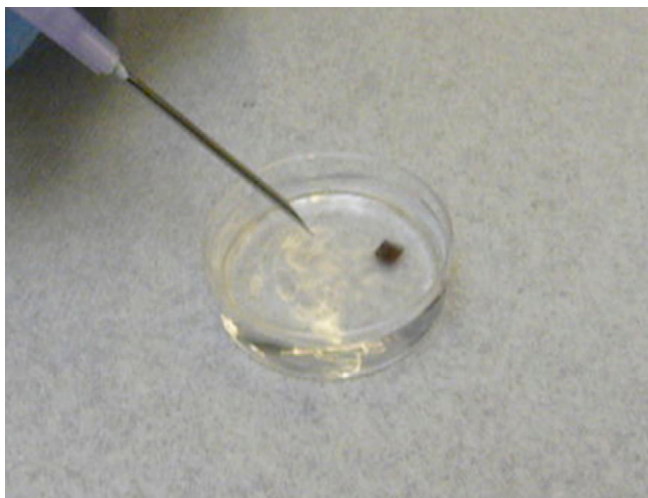

**Movie S2.** Rapid shape recovery of a square-shape cryogel after syringe injection.

[Movie S2](#)

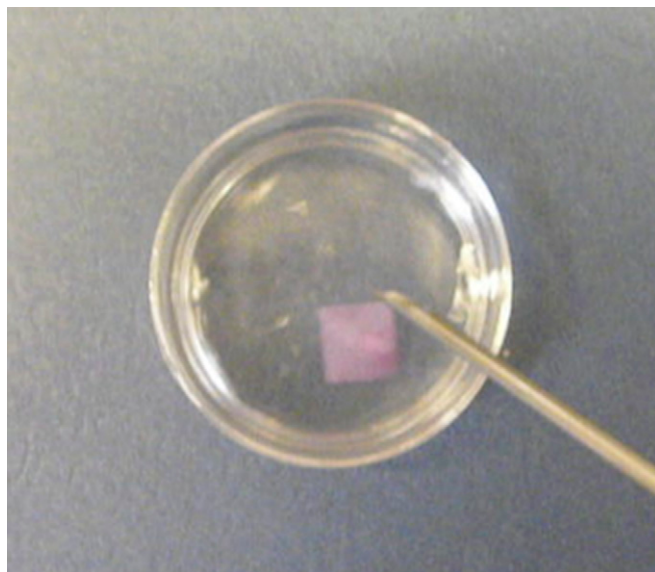

**Movie S3.** Successful syringe injection of a large square-shape ( $8 \times 8 \times 1$  mm) preformed crygel.

[Movie S3](#)

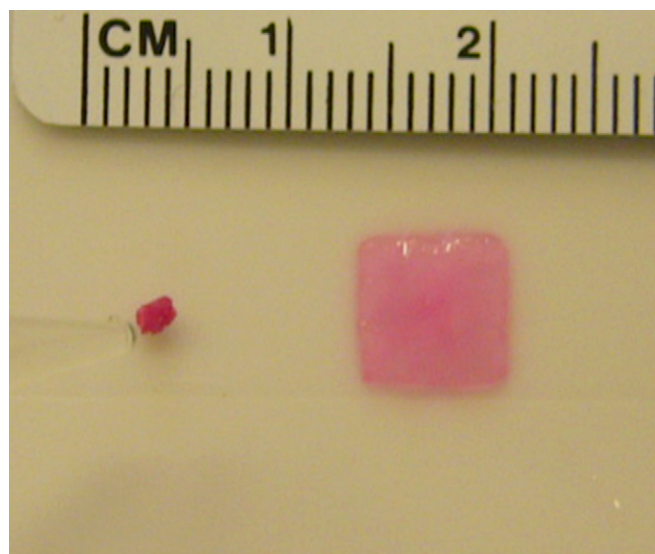

**Movie S4.** Collapsed crygel regains its original memorized shape, size, and volume upon hydration.

[Movie S4](#)
